# Supplementary material for: Lignin and Xylan as Interface Engineering Additives for Improved Environmental Durability of Sustainable Cellulose Nanopapers
Source: MDPI journal article supplement (doi:10.3390/ijms222312939), 2021-11-29
Supplement: s1 [file s1]

## Supplementary

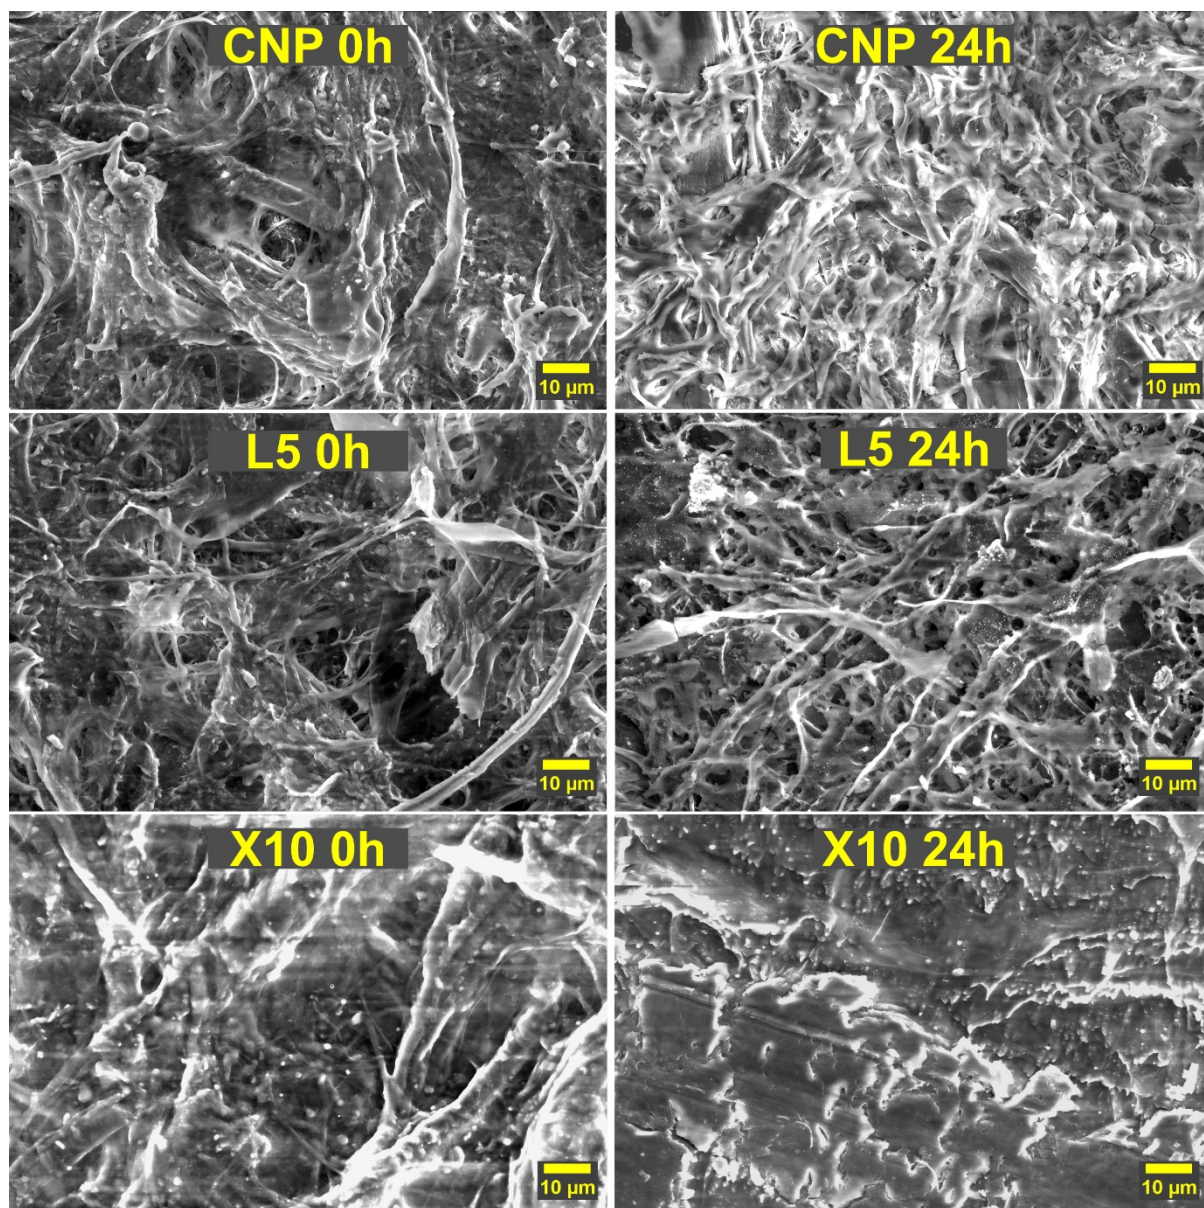

Figure S1. SEM micrographs showing the surface of selected NP compositions before and after UV aging, at a magnification of 1000x.

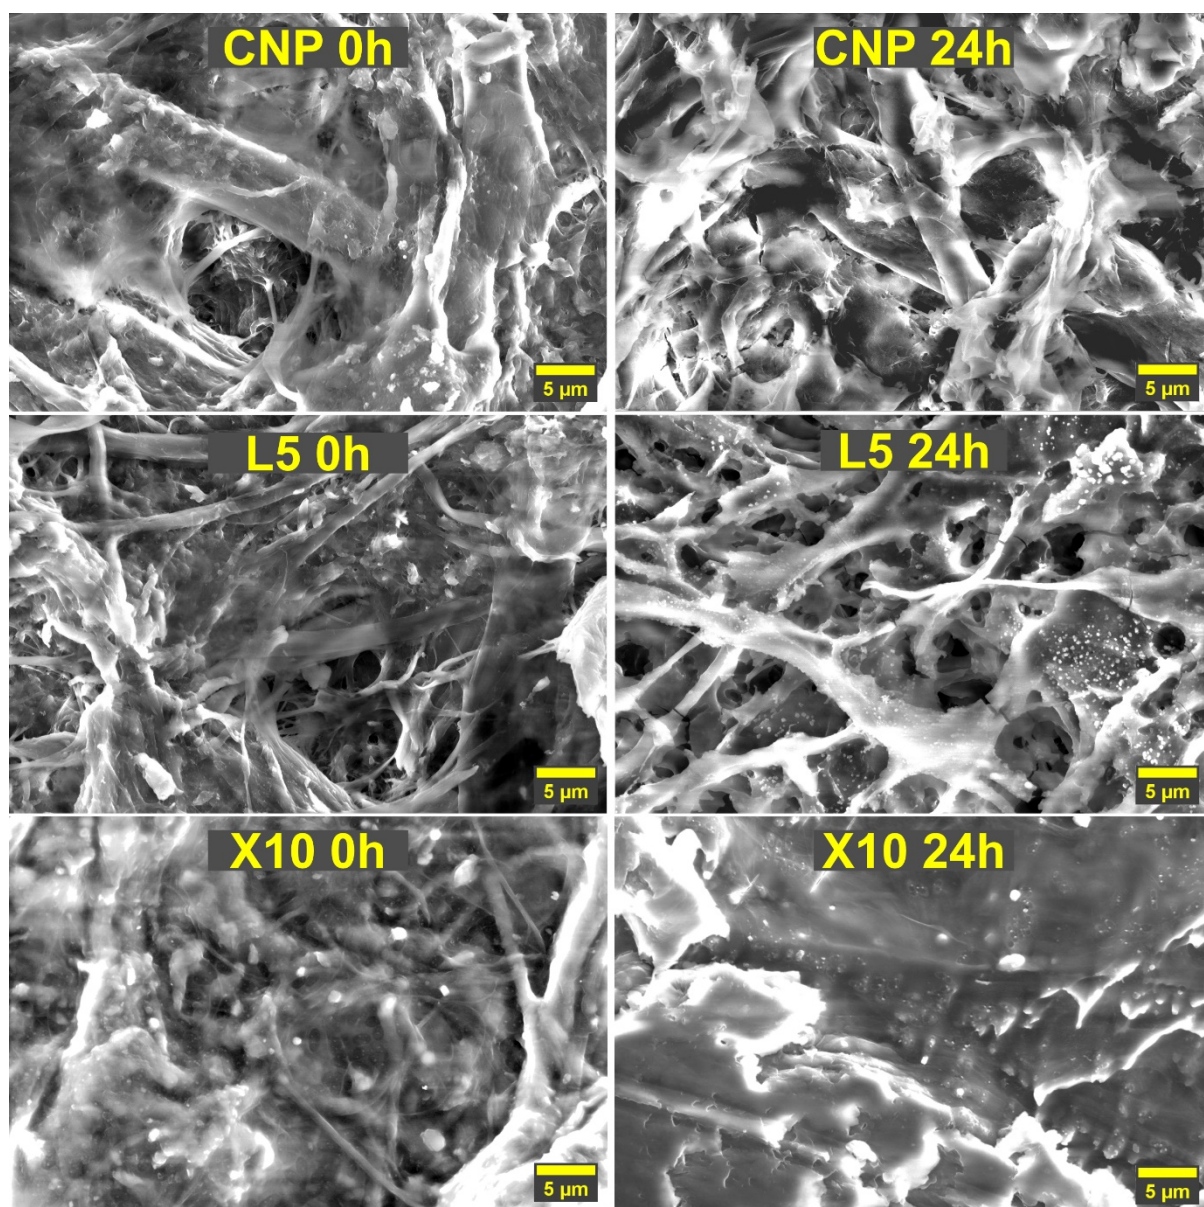

Figure S2. SEM micrographs showing the surface of selected NP compositions before and after UV aging, at a magnification of 2500x.



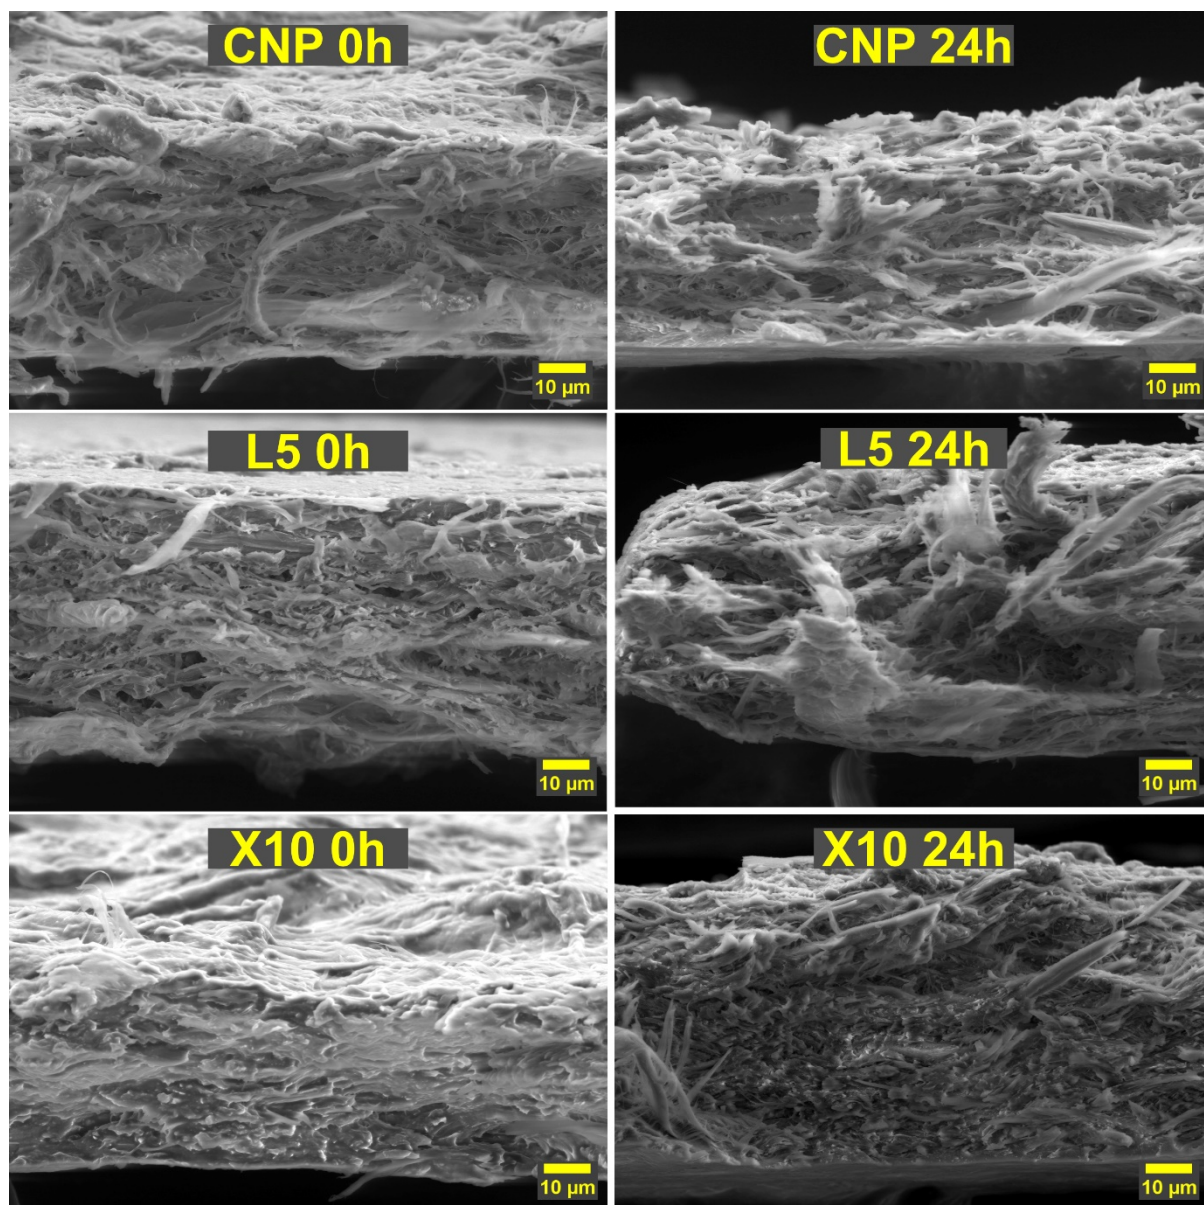

Figure S3. SEM micrographs showing the cross-section of selected NP compositions before and after UV aging, at a magnification of 1000x.
